# Supplementary material for: Sustained and improved guselkumab response in patients with active psoriatic arthritis regardless of baseline demographic and disease characteristics: pooled results through week 52 of two phase III, randomised, placebo-controlled studies
Source: HighWire-hosted journal article supplement (doi:10.1136/rmdopen-2022-002195), 2022-03-01
Supplement: rmdopen-2022-002195supp002_data_supplement.pdf [file rmdopen-2022-002195supp002_data_supplement.pdf]

**Supplemental Table 2. Odds ratios and 95% confidence intervals comparing IGA 0/1<sup>a</sup> and IGA 0<sup>b</sup> responses at week 24 between each guselkumab group and placebo within patient subgroups defined by baseline demographics, disease characteristics, and DMARD use at baseline among pooled DISCOVER-1 and DISCOVER-2 patients with  $\geq 3\%$  BSA with PsO & IGA  $\geq 2$  at baseline. Prior to Week 24, patients meeting treatment failure criteria were considered non-responders. Missing data through Weeks 24 and 52 were imputed as non-response.**

|                                      | IGA 0/1 Response <sup>a</sup> |                  | IGA 0 Response <sup>b</sup> |                  |
|--------------------------------------|-------------------------------|------------------|-----------------------------|------------------|
|                                      | Odds Ratio (95% CI)           |                  | Odds Ratio (95% CI)         |                  |
|                                      | GUS 100 mg Q4W                | GUS 100 mg Q8W   | GUS 100 mg Q4W              | GUS 100 mg Q8W   |
| <b>All patients</b>                  | 11.0 (7.3, 16.5)              | 8.9 (6.0, 13.5)  | 12.9 (7.7, 21.5)            | 10.3 (6.1, 17.3) |
| <b>Sex</b>                           |                               |                  |                             |                  |
| Male                                 | 14.6 (8.2, 26.0)              | 10.5 (6.0, 18.4) | 17.1 (7.9, 37.4)            | 13.3 (6.1, 29.1) |
| Female                               | 7.9 (4.4, 14.2)               | 7.4 (4.1, 13.5)  | 10.1 (5.0, 20.2)            | 8.4 (4.2, 17.1)  |
| <b>BMI (kg/m<sup>2</sup>)</b>        |                               |                  |                             |                  |
| <25                                  | 10.1 (4.5, 22.6)              | 8.7 (3.9, 19.1)  | 11.3 (4.0, 31.8)            | 11.7 (4.2, 32.7) |
| 25 to <30                            | 11.2 (5.6, 22.6)              | 9.7 (4.9, 19.4)  | 16.0 (6.9, 37.1)            | 10.8 (4.7, 24.8) |
| $\geq 30$                            | 11.5 (6.0, 22.1)              | 8.6 (4.4, 16.6)  | 12.2 (5.2, 28.5)            | 9.3 (3.9, 22.1)  |
| <b>PsA duration (years)</b>          |                               |                  |                             |                  |
| <1                                   | 8.0 (2.7, 23.6)               | 9.8 (3.4, 28.6)  | 6.6 (2.0, 22.5)             | 9.6 (2.9, 31.9)  |
| $\geq 1$ to <3                       | 12.0 (5.3, 27.2)              | 8.6 (3.9, 18.8)  | 10.7 (4.3, 27.0)            | 7.8 (3.1, 19.7)  |
| $\geq 3$                             | 12.1 (7.0, 20.8)              | 9.1 (5.3, 15.7)  | 17.6 (8.4, 36.7)            | 12.3 (5.8, 26.0) |
| <b>BSA affected by psoriasis (%)</b> |                               |                  |                             |                  |
| $\geq 3$ to <10                      | 6.8 (3.6, 13.1)               | 7.2 (3.8, 13.7)  | 9.3 (4.2, 20.6)             | 9.4 (4.3, 20.6)  |
| $\geq 10$ to <20                     | 8.1 (3.8, 17.3)               | 5.9 (2.7, 12.9)  | 9.6 (3.7, 24.8)             | 6.8 (2.6, 18.2)  |
| $\geq 20$                            | 24.6 (11.5, 52.8)             | 15.9 (7.6, 33.2) | 24.1 (9.0, 64.7)            | 16.4 (6.1, 43.9) |
| <b>CRP (mg/dL)</b>                   |                               |                  |                             |                  |
| <1                                   | 9.8 (5.5, 17.2)               | 7.9 (4.5, 13.9)  | 11.6 (5.7, 23.3)            | 10.3 (5.1, 21.0) |
| 1 to <2                              | 12.9 (5.2, 31.8)              | 7.6 (3.1, 18.8)  | 9.4 (3.0, 29.3)             | 9.9 (3.1, 31.9)  |
| $\geq 2$                             | 11.9 (5.4, 26.4)              | 12.5 (5.7, 27.3) | 20.0 (7.2, 55.2)            | 10.7 (3.9, 29.2) |
| <b>PASI score at baseline (0-72)</b> |                               |                  |                             |                  |
| <12                                  | 7.8 (4.8, 12.8)               | 7.2 (4.4, 11.7)  | 9.1 (5.1, 16.4)             | 8.4 (4.7, 15.1)  |
| $\geq 12$ to <20                     | 20.0 (7.1, 55.8)              | 13.9 (4.9, 39.7) | 18.5 (5.1, 67.0)            | 13.0 (3.5, 48.7) |
| $\geq 20$                            | 22.3 (7.5, 66.3)              | 14.8 (5.0, 43.5) | NC (NC, NC)                 | NC (NC, NC)      |
| <b>csDMARD/MTX use</b>               |                               |                  |                             |                  |
| None                                 | 21.1 (9.7, 46.1)              | 10.3 (5.1, 20.7) | 20.1 (7.9, 51.0)            | 10.5 (4.2, 26.5) |
| Any csDMARD                          | 8.8 (5.3, 14.4)               | 8.3 (5.0, 13.7)  | 10.4 (5.6, 19.4)            | 10.3 (5.5, 19.3) |
| MTX                                  | 9.2 (5.5, 15.4)               | 8.1 (4.8, 13.8)  | 10.6 (5.5, 20.2)            | 10.3 (5.3, 19.8) |

<sup>a</sup>IGA psoriasis score of 0 (cleared) or 1 (minimal) and  $\geq 2$ -grade reduction from baseline in the IGA psoriasis score among patients with  $\geq 3\%$  BSA with psoriasis & IGA  $\geq 2$  at baseline

<sup>b</sup>IGA psoriasis score of 0 and  $\geq 2$ -grade reduction from baseline in the IGA psoriasis score among patients with  $\geq 3\%$  BSA with psoriasis & IGA  $\geq 2$  at baseline

BMI=Body mass index, BSA=Body surface area, CI=confidence interval, CRP=C-reactive protein, csDMARD=Conventional synthetic disease-modifying antirheumatic drug, GUS=Guselkumab, IGA=Investigator's Global Assessment, MTX=Methotrexate, PASI=Psoriasis Area and Severity Index, PsA=Psoriatic arthritis, PsO=psoriasis, Q4W/Q8W=every four weeks/every eight weeks
