# Supplementary material for: Sustained and improved guselkumab response in patients with active psoriatic arthritis regardless of baseline demographic and disease characteristics: pooled results through week 52 of two phase III, randomised, placebo-controlled studies
Source: HighWire-hosted journal article supplement (doi:10.1136/rmdopen-2022-002195), 2022-03-01
Supplement: rmdopen-2022-002195supp003_data_supplement.pdf [file rmdopen-2022-002195supp003_data_supplement.pdf]

**Supplemental Table 3. Odds ratio and 95% confidence interval for comparing patient-reported outcomes (FACIT-F response<sup>a</sup>, HAQ-DI response<sup>b</sup>) at week 24 between each guselkumab group and placebo within patient subgroups defined by baseline demographics, disease characteristics, and DMARD use at baseline among pooled DISCOVER-1 and DISCOVER-2 patients. Prior to Week 24, patients meeting treatment failure criteria were considered non-responders. Missing data through Weeks 24 and 52 were imputed as non-response.**

|                               | FACIT-F Response <sup>a</sup> |                | HAQ-DI Response <sup>b</sup> |                 |
|-------------------------------|-------------------------------|----------------|------------------------------|-----------------|
|                               | Odds Ratio (95% CI)           |                |                              |                 |
|                               | GUS 100 mg Q4W                | GUS 100 mg Q8W | GUS 100 mg Q4W               | GUS 100 mg Q8W  |
| <b>All patients</b>           | 2.2 (1.6, 2.9)                | 1.9 (1.4, 2.6) | 2.9 (2.1, 4.0)               | 2.3 (1.7, 3.1)  |
| <b>Sex</b>                    |                               |                |                              |                 |
| Male                          | 2.4 (1.6, 3.7)                | 1.7 (1.2, 2.6) | 3.3 (2.1, 5.2)               | 1.9 (1.2, 2.9)  |
| Female                        | 1.8 (1.2, 2.8)                | 2.2 (1.4, 3.3) | 2.5 (1.6, 3.9)               | 2.8 (1.8, 4.3)  |
| <b>BMI (kg/m<sup>2</sup>)</b> |                               |                |                              |                 |
| <25                           | 2.1 (1.1, 3.7)                | 2.3 (1.3, 4.1) | 3.0 (1.6, 5.7)               | 1.9 (1.0, 3.4)  |
| 25 to <30                     | 2.0 (1.2, 3.3)                | 1.7 (1.0, 2.7) | 2.7 (1.6, 4.5)               | 2.2 (1.3, 3.7)  |
| ≥30                           | 2.4 (1.5, 3.7)                | 2.0 (1.2, 3.1) | 3.2 (2.0, 5.4)               | 2.7 (1.6, 4.6)  |
| <b>Swollen joint count</b>    |                               |                |                              |                 |
| <10                           | 2.6 (1.7, 3.9)                | 2.1 (1.4, 3.1) | 3.4 (2.2, 5.3)               | 2.3 (1.5, 3.6)  |
| 10-15                         | 1.7 (1.0, 2.9)                | 1.4 (0.8, 2.5) | 3.0 (1.7, 5.5)               | 2.6 (1.4, 4.7)  |
| >15                           | 1.9 (1.0, 3.6)                | 2.4 (1.3, 4.7) | 2.1 (1.1, 4.0)               | 2.0 (1.0, 3.8)  |
| <b>Tender joint count</b>     |                               |                |                              |                 |
| <10                           | 1.6 (0.8, 3.3)                | 1.4 (0.7, 2.8) | 3.1 (1.3, 7.5)               | 3.6 (1.5, 8.9)  |
| 10-15                         | 2.3 (1.3, 3.9)                | 1.8 (1.1, 3.1) | 3.9 (2.1, 7.1)               | 2.5 (1.4, 4.4)  |
| >15                           | 2.3 (1.5, 3.4)                | 2.2 (1.5, 3.3) | 2.6 (1.7, 3.9)               | 2.0 (1.3, 3.0)  |
| <b>PsA duration (years)</b>   |                               |                |                              |                 |
| <1                            | 2.0 (0.9, 4.2)                | 2.8 (1.3, 5.7) | 3.0 (1.3, 7.0)               | 6.1 (2.6, 14.4) |
| ≥1 to <3                      | 2.2 (1.2, 4.1)                | 1.5 (0.8, 2.7) | 4.9 (2.6, 9.6)               | 3.3 (1.7, 6.3)  |
| ≥3                            | 2.2 (1.5, 3.2)                | 1.9 (1.3, 2.8) | 2.4 (1.6, 3.6)               | 1.5 (1.0, 2.3)  |
| <b>CRP (mg/dL)</b>            |                               |                |                              |                 |
| <1                            | 1.9 (1.3, 2.9)                | 1.9 (1.3, 2.8) | 3.4 (2.2, 5.3)               | 2.3 (1.5, 3.6)  |
| 1 to <2                       | 3.0 (1.5, 5.9)                | 2.1 (1.1, 4.2) | 4.2 (2.0, 8.6)               | 2.5 (1.2, 5.1)  |
| ≥2                            | 2.3 (1.3, 4.1)                | 1.9 (1.1, 3.2) | 1.9 (1.0, 3.3)               | 2.2 (1.3, 3.8)  |
| <b>csDMARD/MTX use</b>        |                               |                |                              |                 |
| None                          | 3.4 (2.0, 5.8)                | 3.0 (1.8, 5.1) | 7.3 (3.8, 14.1)              | 5.1 (2.6, 9.7)  |
| Any csDMARD                   | 1.8 (1.2, 2.5)                | 1.6 (1.1, 2.2) | 2.1 (1.5, 3.1)               | 1.8 (1.2, 2.6)  |
| MTX                           | 1.8 (1.2, 2.6)                | 1.5 (1.0, 2.2) | 2.2 (1.5, 3.2)               | 1.4 (1.0, 2.2)  |

<sup>a</sup>≥ 4-point improvement in FACIT-F score from baseline. The FACIT-F score is calculated based on the FACIT-fatigue questionnaire that comprises of 13 questions, with each question graded on a 5-point scale (0-4). The FACIT-F scores can range from 0 to 52 with higher scores indicating less fatigue.

<sup>b</sup>≥0.35-point improvement in HAQ-DI score from baseline among patients with a HAQ-DI score ≥0.35 at baseline. The score is the average of the computed categories scores (dressing, arising, eating, walking, hygiene, gripping and daily living). Lower scores are indicative of better functioning.

BMI=Body mass index, CI=confidence interval, CRP=C-reactive protein, csDMARD=Conventional synthetic disease-modifying antirheumatic drug, FACIT-F= Functional Assessment of Chronic Illness Therapy-Fatigue, GUS=Guselkumab, HAQ-DI= Health Assessment Questionnaire-Disability Index, MTX=Methotrexate, PsA=Psoriatic arthritis, Q4W/Q8W=every four weeks/every eight weeks
